## **A class of GATA3 mutation reprograms the breast cancer transcriptional network through gain and loss of function**

**Authors:** Motoki Takaku<sup>1</sup>, Sara A. Grimm<sup>2</sup>, John D. Roberts<sup>1</sup>, Kaliopi Chrysovergis<sup>1</sup>, Brian D. Bennett<sup>2</sup>, Page Myers<sup>3</sup>, Lalith Perera<sup>4</sup>, Charles J. Tucker<sup>5</sup>, Charles M. Perou<sup>6</sup> and Paul A. Wade<sup>1\*</sup>

### **Affiliations**

<sup>1</sup>Epigenetics and Stem Cell Biology Laboratory, National Institute of Environmental Health Sciences, Research Triangle Park, NC, USA

<sup>2</sup>Integrative Bioinformatics, National Institute of Environmental Health Sciences, Research Triangle Park, NC, USA

<sup>3</sup>Comparative Medicine Branch, National Institute of Environmental Health Sciences, Research Triangle Park, NC, USA

<sup>4</sup>Laboratory of Genome Integrity and Structural Biology, National Institute of Environmental Health Sciences, Research Triangle Park, NC, USA

<sup>5</sup>Fluorescence Microscopy and Imaging Center, National Institute of Environmental Health Sciences, Research Triangle Park, NC, USA

<sup>6</sup>Lineberger Comprehensive Cancer Center, University of North Carolina, Chapel Hill, NC 27599, USA

\*Correspondence to: Paul A. Wade (wadep2@niehs.nih.gov)

## **Abstract**

GATA3 is frequently mutated in breast cancer; these mutations are widely presumed to be loss of function. Here, we address molecular alterations downstream of a novel class of GATA3 mutations, revealing both gain and loss of function. Mutation of one allele of GATA3 led to loss of binding and decreased expression at a subset of genes, including Progesterone Receptor. At other loci, associated with epithelial to mesenchymal transition, gain of binding at a novel sequence motif correlated with increased gene expression. These results demonstrate that not all GATA3 mutations are equivalent and that these mutations impact breast cancer through gain and loss of function.

## Introduction

Breast cancer is an important cause of cancer mortality among women. Transcriptomic data classifies breast cancer into 6 subtypes - (1) Luminal A; (2) Luminal B; (3) HER2 positive; (4) Basal-like; (5) Claudin-low; and (6) Normal breast-like - that differ not only in molecular characteristics but also in disease course and response to therapy<sup>1-3</sup>. Systems-level analyses have identified GATA3 as one of the most frequently mutated genes in breast cancers<sup>4,5</sup>, yet the function of GATA3 mutations in breast tumors is poorly understood.

GATA3 belongs to the zinc-finger transcription factor family that functions as a key regulator of multiple developmental pathways including mammary epithelial cell differentiation<sup>6-10</sup>. In breast cancer, the expression level of GATA3 is strongly associated with estrogen receptor alpha (ER $\alpha$ )<sup>11,12</sup>, and loss of GATA3 expression is associated with poor prognosis<sup>13,14</sup>. In both animal and human cell line models, GATA3 functions as a tumor suppressor by inducing epithelial and suppressing mesenchymal fates<sup>15-17</sup>. GATA3 acts as a pioneer transcription factor during mesenchymal-to-epithelial transition<sup>18</sup>; chromatin binding of GATA3 is important for the recruitment of other co-factors such as ER $\alpha$  and FOXA1 in breast cancer cells<sup>19,20</sup>.

Based on the The Cancer Genome Atlas (TCGA) data cohort, approximately 10% of breast tumors harbor somatic mutations in the GATA3 gene<sup>5,21</sup>. These mutations are typically heterozygous and highly concentrated in the C-terminal region of GATA3, where the DNA binding domain is located. The high frequency suggests that GATA3 mutations are cancer “drivers”. Mutations in the second zinc finger domain cause alterations of DNA binding activity and protein stability of GATA3<sup>22-24</sup>. However, it is still largely unknown how GATA3 mutations influence broader breast cancer properties such as changes in gene regulatory networks and tumor growth<sup>25</sup>.

Here we illuminate the impact of GATA3 mutations by establishing a novel classification strategy. Utilizing the CRISPR-Cas9 technology, we develop a model to demonstrate the molecular outcomes of one class of GATA3 mutation

(frame-shift mutation in zinc finger 2) in breast cancer. Our results shed new light on the impact of GATA3 mutations in breast cancer.

## Results

### Classification of GATA3 mutations reveals distinct features of GATA3

#### ZnFn2 mutations

In breast cancer, GATA3 expression is a prominent marker of luminal breast tumors, and loss of GATA3 expression is associated with aggressive tumor phenotypes. Utilizing the gene expression data from the largest available breast cancer data cohort: the Molecular Taxonomy of Breast Cancer International Consortium (METABRIC)<sup>4</sup>, we created two patient groups based on GATA3 gene expression (Fig. 1a). Consistent with the previous literature, breast tumors with lower GATA3 expression showed significantly worse prognosis than tumors with higher GATA3 expression (Fig. 1a). Within high GATA3 expression cases, patients harboring GATA3 mutations represent better prognosis than GATA3 wild-type cases (Fig. 1a), suggesting that GATA3 mutations are not simple loss-of-function mutations.

GATA3 mutations are localized predominantly in Exons 5 and 6, impacting coding regions and splice sites (Fig. 1b, Supplementary fig. 1a-c). The majority are insertion/deletion (indel) mutations that induce frame-shifts or alternative splicing, resulting in protein truncation or extension (Supplementary fig. 1d). Based on the predicted protein products, we classified GATA3 mutations into five groups: (1) ZnFn2 mutations, (2) splice site mutations, (3) truncation mutations, (4) extension mutations, and (5) missense mutations (Fig. 1b, Supplementary fig. 1d). To assess features within each mutant group, we analyzed the distribution of breast cancer intrinsic subtypes in the METABRIC cohort. As expected, tumors with high GATA3 expression were frequently observed in luminal tumors, while low GATA3 expression cases were often observed in the basal subtype (Fig. 1c). Among 1,980 patient cases, 230 tumors harbored GATA3 mutations, and 75% of the mutations were observed in luminal tumors (47% in luminal A, 28% in luminal B). GATA3 mutations were very infrequent in basal tumors (Fig. 1c). Interestingly, ZnFn2 mutations were distinct amongst GATA3 mutations, as they were predominantly found in luminal B

tumors (52%, 16 out of 29 cases) (Fig. 1d, Supplementary fig. 1e), whereas splice site and truncation mutations were frequently observed (62% or 68% respectively) (Fig. 1d, Supplementary fig. 1e) in luminal A tumors. The distributions of extension and missense mutations were similar to that of GATA3 wild-type. To confirm these observations in an independent cohort, we explored the TCGA data set. Again, tumors bearing ZnFn2 mutations were typically categorized as luminal B, and the splice site mutant tumors were often categorized as luminal A (Supplementary fig. 1e-f). Because luminal B tumors tend to have worse prognosis than luminal A<sup>3</sup>, we performed survival analysis from records in the METABRIC data. Within high GATA3 expression cases, patients carrying ZnFn2 mutations had significantly worse survival (10-year survival rate) than patients with other GATA3 mutations (Fig. 1e). The differential clinical outcomes between ZnFn2 mutations vs. splice site mutations indicate that a mutation in the ZnFn2 motif may be more damaging than complete loss of this domain (Supplementary fig. 1g).

### **ZnFn2 mutation promotes tumor growth and alters the transcription program**

To dissect the impact of GATA3 mutations in breast cancer properties, we decided to focus on ZnFn2 mutations, because (1) gene expression profiles of established luminal breast cancer cell lines are known to be classified into the luminal B subtype<sup>26</sup>, and the ZnFn2 mutation group is the only group that is significantly frequently classified as luminal B; (2) the ZnFn2 mutations are associated with poor clinical outcomes. The frame-shift mutation at arginine 330 (R330fs) is the only mutation found in all four breast cancer data cohorts examined (Fig. 1a, Supplementary fig. 1a-c). The mutations at R330 are typically heterozygous (9 out of 10 cases) and frequently are 1-nucleotide insertions or 2-nucleotide deletions, resulting in a premature stop codon at the same chromosome position (Chromosome 10: 8,111,563-8,111,565). A model structure of the DNA-binding domain of the R330fs mutant protein suggested altered DNA-binding properties of the mutant due to a significant conformational change near the Zn binding region of the second zinc finger (Supplementary fig. 2a). To model the

situation observed in patients, we introduced a 2-nucleotide deletion at R330 into T47D breast cancer cells using CRISPR-Cas9 (Fig. 2b, Supplementary fig. 2b-c)<sup>27</sup>. The mutant cell clone (CR3) expressed both wild-type and mutant GATA3 proteins endogenously (Fig. 2c).

The proliferation rate of mutant cells was comparable to control T47D cells *in vitro* (Supplementary fig. 2d), while the mutant cells exhibited different morphology as compared to control cells (Fig. 2d). The mutant (CR3) cells formed less rounded colonies, and exhibited increased cell spreading and edge protrusion as well as distinct cell-to-cell boundaries. To measure the impact of this mutation on tumor growth *in vivo*, we conducted xenograft experiments. T47D cells bearing either wild-type GATA3 or the R330fs mutation were injected into the mammary fat pads of nude mice carrying subcutaneous estrogen pellets. Three to five weeks later, GATA3 mutant tumors exhibited significantly higher luminescent signals than controls, indicating that the R330fs mutant tumors had a higher growth rate *in vivo* (Fig. 2e).

To investigate this phenotypic alteration at a molecular level, we conducted RNA-seq analysis from *in vitro* cultured cells. At a false discovery rate (FDR) <0.01, |fold change| >2, we identified 1,173 differentially expressed genes (601 genes up-regulated, 572 genes down-regulated) (Fig. 3a, Supplementary table 1). Clustering analysis showed distinctly different gene expression patterns between wild-type and GATA3-mutant cells (Fig. 3b). We performed gene pathway analyses on the differentially expressed genes (DEGs) to extract up- and down-regulated functional networks in the mutant cells. Up-regulated genes, including the epithelial to mesenchymal regulators TWIST1 and SNAI2 (SLUG)<sup>28</sup>, are associated with cell movement- and cell invasion-related pathways, consistent with the phenotypes observed in the mutant cells (Fig. 3c). On the other hand, down-regulated genes, including progesterone receptor (PGR), are enriched with cell differentiation- and development- related pathways, suggesting altered properties in the mutant cells (Supplementary fig. 2e). Analysis of upstream regulators of DEGs indicated down-regulation of the progesterone receptor pathway (Fig. 3d), suggesting that the decreased PGR

mRNA levels observed in the GATA3 mutant cells has a functional outcome. We also performed RNA-seq analysis of tumors excised from the mouse xenograft model. Although the global gene expression profile was distinct from that derived *in vitro*, the expression patterns within the differentially expressed genes identified by *in vitro* cell system were largely conserved in the xenografts (Fig. 3e, Supplementary fig. 2f). Finally, gene ontology analyses with cancer data panels revealed common gene signatures between the mutant cells and aggressive tumors (Supplementary table 2-3). For example, from the comparison between differentially down-regulated genes (572 genes) in GATA3 mutant cells and the “Ductal Breast Carcinoma Epithelia - Dead at 1 Year<sup>29</sup>” clinical gene expression data, the expression data from 351 genes were available, and 84 genes were significantly ( $p < 0.05$ ) down-regulated in the patients deceased at 1 year. Among 84 genes, 69 genes were categorized in the top 5% under-expressed genes (Fig. 3f, Supplementary table 2). Taken together, the systematic gene expression data analyses indicated that more aggressive gene signatures were found in GATA3 ZnFn2 mutant cells.

To address potential off-target effects of the CRISPR-Cas9 system, we established a stable cell pool expressing the R330fs mutant exogenously (ExoR330fs) (Supplementary fig. 3a). The principal features observed in the CRISPR clone (CR3) were also detected in the ExoR330fs cells (Supplementary fig. 3b-d). In addition, we generated a control clone (CRctrl) to rule out any potential off-target effects (Supplementary fig. 3a) by using the wild-type GATA3 gene template as the donor DNA. Analysis of select candidate DEGs suggest that the contributions of clonal specificity and off-target effects to the cellular phenotypes were not significant (Supplementary fig 3b-e).

To further confirm the impact of the R330fs mutant, we exogenously expressed the mutant in two additional luminal breast cancer cell lines, HCC1428 and BT474. In both cell lines, the R330fs mutant expression led to significant reduction of PR as well as other hormone receptor related genes (Supplementary fig. 3f-g). Collectively, our *in vitro* model system suggested that the



transcriptome reprogramming induced by the ZnFn2 mutation had substantial impacts on breast cancer properties including tumor growth.

### **R330fs mutation induces relocation of GATA3 in the genome**

The fundamental difference between wild-type and mutant cells is a 2-nucleotide deletion at the second zinc-finger domain of GATA3. This deletion was predicted to alter DNA binding activity (Supplementary fig. 2a) and, thus, we hypothesized, to alter the genomic distribution of GATA3. To address this question, we performed ChIP-seq analyses using an N-terminal specific GATA3 antibody, which recognizes both wild-type and mutant proteins. We identified approximately equal numbers of GATA3 binding sites in wild-type and mutant cells. To dissect differential binding, we classified the peaks into 3 groups: (1) Increased: increased ChIP-seq signals in the mutant cells, (2) Decreased: decreased signals in the mutant cells, and (3) Unchanged: conserved signals between the cells. At an FDR < 0.05 and |fold change| > 1.5, we observed 5,161 increased peaks and 5,954 decreased peaks (Fig. 3a-c). Most binding sites (~75%) are unchanged between the wild-type and mutant cells.

To evaluate the impact of differential binding events on gene expression, we assigned the peaks to the nearest transcription start sites (TSS) and performed Gene Set Enrichment Analysis. Increased peaks were strongly associated with up-regulated genes including TWIST1 (Fig. 3a, 3d). Decreased peaks were associated with down-regulated genes including PGR (Fig 3a, 3d, Supplementary fig. 4a). This bias in transcriptional outcome was not observed in genes associated with unchanged peaks.

To elucidate the impact on chromatin structure, we performed ATAC-seq<sup>30</sup>. Scatterplot and metaplot analyses of each group revealed a positive correlation between GATA3 binding and chromatin accessibility (Fig. 3e, Supplementary fig. 4b-c), consistent with its function as a pioneer factor<sup>18,19</sup>. The signal levels at baseline in the decreased peak group were lower than those in the increased peak group (Supplementary fig. 4d), suggesting a potential difference in chromatin architecture.

We further investigated sequence enrichment at the differential binding sites. GATA3 is known to recognize the WGATAR motif; therefore, we explored the frequency of this consensus motif in each binding group (Supplementary fig. 4e). Interestingly, the increased binding peaks contained less of the consensus motif than did the decreased binding peaks, implying the R330fs mutant might have altered DNA-binding properties. These results suggest that relocalization of GATA3 induced by the R330fs mutation contributes to the global transcriptional alterations in breast cancer cells and, importantly, that the impact of the relocalization is due to a subset of the GATA3 sites. Determining the molecular rationale for why specific GATA3 sites are critical to phenotype and outcome thus becomes an important goal for deciphering the role of GATA3 in cancer.

### **Genomic distribution of mutant GATA3 differs from wild-type**

Although ZnFn2 mutations were predicted to have loss-of-function, our ChIP-seq data suggested both gain- and loss-of-function at specific genomic loci. To further investigate, we determined the localization of the mutant in ExoR330fs cells by using the Ty1 epitope tag antibody (Fig. 5a, Supplementary fig. 5a), identifying 6,239 peaks. Motif enrichment analysis revealed a unique binding motif 'AGATBD' (Fig. 5b). R330fs binding signals were higher in the increased total GATA3 binding group (Fig. 3b-c) as compared to the other groups (Fig. 5c). We also performed wild-type GATA3 specific ChIP-seq using an antibody, which binds to the C-terminal region of GATA3, thereby recognizing wild-type GATA3 but not the R330fs mutant (Fig. 5a). As expected, the wild-type specific binding peaks contained a significant enrichment of the consensus binding motif both in wild-type and mutant cells (Fig. 5b). Peak overlap analysis indicated co-localization of both wild-type and mutant GATA3 at 2,944 loci, the unique presence of the R330fs mutant alone at 3,295 loci, and wild-type GATA3 unique localization at 6,751 loci (Fig. 5d-e). The 'AGATBD' motif was significantly enriched in R330fs unique peaks (Fig. 5f, Supplementary fig. 6b) while the consensus motif was depleted. To confirm the mutant specific localization in the endogenous expression cell system, we analyzed the total GATA3 ChIP-seq data along with R330fs and wild-type GATA3 ChIP-seq data. At a subset of R330fs

unique peak regions, we observed increased binding signals from total GATA3 ChIP-seq but not from wild-type GATA3 ChIP-seq in mutant cells, suggesting unique localization of the mutant when expressed under physiological control (Supplementary fig. 5a). Consistently, metaplot analysis at R330fs unique peaks showed increased levels of total GATA3 binding in mutant cells compared to wild-type cells, while the wild-type GATA3 binding was decreased at those peaks (Supplementary fig. 5c). These data indicated that the endogenously expressed R330fs mutant had a similar distribution pattern to the exogenously expressed protein. Metaplot analysis of wild-type GATA3 ChIP-seq data at different GATA3 peak classes also suggested altered distribution of wild-type GATA3 in mutant cells (Supplementary fig. 5d). Taken together, the genomic profiling suggested novel GATA3 binding events induced by the R330fs mutant. Importantly, both RNA-seq and ChIP-seq data indicated that those gained GATA3 binding events led to activation of cell migration and EMT related pathways. Consistent with this data, mutant cells exhibit an altered phenotype more consistent with mesenchymal characteristics, including cell shape, cell boundaries, and size/distribution of actin stress fibers (Fig. 2d; Fig. 5g-h).

### **ZnFn2 mutations attenuate the expression of progesterone receptor and the anti-proliferative effect of progesterone**

Next, we sought to investigate molecular and phenotypic outcomes induced by loss of GATA3 binding. One of the most striking losses of GATA3 binding was observed upstream of the PGR locus (Fig. 4a). Consistently, PR gene expression was down-regulated in the mutant cells (Supplementary fig. 3c). PR expression is a critical prognostic marker in breast cancer, and lower expression of PR is associated with poor prognosis<sup>31</sup>. We confirmed that PR expression was dramatically reduced at the protein level in the mutant T47D cells (Fig. 6a). The luminal breast cancer cell lines, MCF7 and KPL-1, are known to possess recurrent ZnFn2 mutations (D336fs)<sup>24,32,33</sup>. We confirmed these GATA3 frameshift mutations were present in our MCF7 and KPL-1 cells (Supplementary fig. 6a). The expression levels of PR in these cells were also significantly lower than those in T47D cells (Supplementary fig. 6a).

We then evaluated potential enhancer function of the GATA3-bound region upstream of PGR. The CRISPR-Cas9 technique was utilized to delete specific chromatin regions. The gRNAs were designed to target two major peaks (Pk1, Pk2) and a control region (Ctrl) (Fig. 6b, Supplementary fig. 6b). PR expression in the Pk1-depleted cells was reduced, but the Pk2-depleted cells and control cells did not exhibit a significant reduction (Fig. 6b, Supplementary fig. 6c). These results implicate the Pk1 locus as rate-limiting for PR expression.

Progesterone, a ligand for progesterone receptor, is reported to have anti-proliferative function in PR-positive breast cancers *in vivo* and *in vitro*<sup>34-36</sup>. Given our results with the proposed PR-enhancer deletion, we treated the T47D cells with progesterone and measured cell proliferation. Consistent with previous reports, growth of control T47D cells was strongly inhibited by progesterone (Fig. 6c-d). However, this anti-proliferative effect was significantly weaker in the R330fs mutant cells (Fig. 6c-d). A similar weak inhibition was also detected in MCF7 cells, which also bear a ZnFn2 mutation. To confirm the importance of PR action in the mutant cells, we transduced CR3 cells with PR-A and PR-B (Supplementary fig. 6d), and tested the effect of progesterone. Exogenous expression of either PR-A or PR-B rescued progesterone sensitivity (Fig. 6e). Conversely, PR knockdown in control T47D cells generated a progesterone tolerance similar to GATA3 mutant cells (Fig. 6f, Supplementary fig. 6e). We extended these observations to a different system by altering expression levels of wild-type and mutant GATA3 in KPL-1 cells, which has a ZnFn2 mutation (D336fs). Depletion of endogenous GATA3 in these cells (both wild-type and mutant versions) partially rescued PR expression. Overexpression of wild-type GATA3 further restored the expression of PR at both RNA and protein levels (Supplementary fig. 6f-g). These data indicated that ZnFn2 mutations modulate PR expression and progesterone sensitivity in multiple cellular settings.

To further explore this apparent growth advantage in the presence of progesterone, we turned to the xenograft model. In this assay, progesterone pellets were simultaneously implanted into mice along with estrogen pellets. The GATA3-mutant tumors exhibited a distinct growth advantage *in vivo* over wild-

type T47D cells in the presence of progesterone pellets (Fig 6g). Analysis of RNA extracted from the developing tumors at necropsy confirmed a reduced expression of PR in the R330fs mutant tumors (Supplementary fig. 6h). These results suggest that PR is a major downstream target of GATA3, and its expression is down-regulated in the presence of ZnFn2 mutations.

### **An aberrant PR-regulatory network in GATA3 mutant tumors**

We used a systems approach to explore the molecular mechanisms by which decreased PR expression contributes to the phenotypic outcomes in the ZnFn2 mutants. RNA-seq revealed 824 genes (617 up-regulated genes, 207 down-regulated genes) as downstream targets of PR (Fig. 7a, Supplementary table 1). The gene ontology analysis indicated that up-regulated genes were significantly enriched with cellular movement and cellular development related genes, including KRT4 and GJB2 (Supplementary fig. 7a-b, Supplementary table 1). Down-regulated genes are significantly associated with tissue morphology, cellular homeostasis, and angiogenesis related pathways, including TWIST1 (Supplementary fig. 7c, Supplementary table 1). At an FDR <0.01, |fold change| >2, only 221 genes were up-regulated, and 33 genes were down-regulated in the mutant cells by progesterone treatment (Fig. 7a-b). Upon progesterone treatment, 1,213 genes (561 genes up-regulated, 652 genes down-regulated) were differentially expressed between mutant and control T47D cells. We conducted RNA-seq analysis of xenograft tumors xenografts grown in the presence of progesterone pellets, and analyzed differentially expressed genes. The expression patterns within DEGs were largely conserved in tumors from the xenografts (Supplementary fig. 7d-e).

To understand the contribution of PR action to gene expression responses, we determined the chromatin localization of PR in T47D control cells as well as GATA3 mutant cells. A large number (60,966) of PR binding peaks were observed in control T47D cells after progesterone treatment (Fig 7c). Notably, 39,639 PR binding peaks were also detected in the mutant cells, and many of them were overlapped with PR peaks in T47D control cells. At a FDR <0.05,

|fold change| >1.5, 18,175 loci were defined as part of an increased binding group, and 16,214 loci were defined as the decreased binding group, while 33,834 sites were unchanged (Fig. 7d). The GSEA analysis indicated that those loci displaying differential binding levels were strongly correlated with differential gene expression between control and mutant T47D cells (Supplementary fig. 7f).

Finally, to assess the relevance of our findings in these model systems, we returned to patient data. In both the METABRIC<sup>4</sup> and TCGA breast cancer cohorts<sup>21</sup>, PR expression in ZnFn2 tumors was significantly lower than that in other GATA3 mutant tumors or in luminal breast tumors that express wild-type GATA3 (Fig. 7e, Supplementary fig. 7g). Immunohistochemistry data in the TCGA cohort also supported lower expression of PR in ZnFn2 tumors (Supplementary fig. 7h). TWIST1, which is upregulated by R330fs GATA3, was upregulated in ZnFn2 mutant tumors in a similar comparison (Fig. 7e, Supplementary fig. 7g). GATA3 expression levels were similar in all tumors bearing GATA3 mutations, including ZnFn2 mutations (Supplementary fig. 7g).

To elaborate on the gene expression analysis, we performed ONCOMINE Concept Analyses. As an input gene set, we used 437 genes uniquely up-regulated by progesterone in control T47D cells but not in CR3 cells (Fig. 7a-b). Consistent with our *in vitro* data, expression of many of these genes were positively correlated with PR expression status in breast tumors. In the “Over-expression in Breast Carcinoma - Progesterone Receptor Positive<sup>37</sup>” data cohort, the expression data of 341 genes (out of 437 input genes) were available, and 94 genes were significantly ( $p < 0.05$ ) associated with PR positive status (Fig. 7f). Gene ontology analysis also revealed a significant overlap between down-regulation of those genes and aggressive tumor phenotypes, including worse prognosis and metastasis (Supplementary table 4). In the case of the “Under-expression in Breast Carcinoma - Dead at 3 Years<sup>38</sup>” data, 53 genes out of 345 genes were down-regulated in the category ‘patient deceased at 3 years’ (Supplementary table 1), and 38 genes were categorized in the top 5% under-expressed genes (Fig. 7g, Supplementary table 4).

## Discussion

Recent large-scale breast cancer genomic profiling identified frequent mutations in the GATA3 gene. However, the clinical and molecular outcomes of GATA3 mutations are poorly understood, because there are very few studies describing the functions of mutant GATA3<sup>23,24,39,40</sup>. In this study, classification of the GATA3 mutations revealed different molecular and clinical outcomes. Overall, patients with tumors with GATA3 mutations live longer than patients with wild-type GATA3. GATA3 mutations found in zinc-finger 2, conversely, lead to distinct features: frequent detection in luminal B tumors and worse prognosis. Splice site and truncation mutations (found in Exons 5-6) are frequently detected in luminal A; these patients have better prognosis than those with wild-type GATA3. The differential outcomes between splice site mutations and ZnFn2 mutations suggest that the impact of complete loss of the second zinc-finger motif differs from that of partial loss.

We utilized the CRISPR-Cas9 system to investigate the molecular outcomes induced by ZnFn2 mutations. The GATA3-mutant cells became more aggressive and exhibited faster tumor growth *in vivo*. Transcriptomic analysis identified altered transcriptional programs in the mutant cells, marked by down-regulation of PR and up-regulation of epithelial to mesenchymal regulators such as TWIST1 and SLUG. Previous studies suggested that the mutations in the second zinc-finger domain are loss-of-function mutations, as they are located within the critical DNA-binding domain and impact DNA binding activity<sup>22,39,40</sup>. Indeed, decreased GATA3 binding was observed, particularly in loci where the chromatin accessibility was lower at baseline. At other loci, the GATA3 mutant induced binding gains, enriched in a novel binding motif (AGATBD), that were significantly correlated with increased gene expression levels. The R330fs mutant still contains an intact N-terminal zinc-finger domain, which is known to have higher affinity to the 'AGATB' DNA sequence<sup>41</sup>. Therefore, the mutant may utilize the N-terminal zinc-finger domain for its chromatin localization.

Our *in vitro* and *in vivo* model system identified progesterone receptor as a key downstream target of GATA3. Gene expression and chromatin profiling indicated that PR regulates expression levels of epithelial and mesenchymal marker genes. The ZnFn2 mutant decreases PR expression and disorganizes PR action on chromatin. Consistently, the clinical gene expression data displayed lower expression of PR in ZnFn2 mutant tumors, compared to the other luminal tumors. Many PR regulatory genes defined from our system had significant correlation with PR status in patients, and down-regulation of a subset of those genes are associated with worse prognosis. These findings highlight the role of PR as critical to the maintenance of epithelial identity in luminal breast cancer.



### **Authors' contributions**

Experiments in this study were conceived by MT, JDR, and PAW. Experiments were performed by MT, JDR, KC and PM. Data analysis was performed by MT, SAG, CJT, CMP, and PAW. Molecular modeling was performed by LP. All authors participated in composing and editing the manuscript. All authors read and approved the final manuscript.

### **Acknowledgments**

We gratefully acknowledge NIEHS/NIH core groups (Flow Cytometry Center, Pathology Support Group, Comparative Medicine Branch, Epigenomics core, Fluorescence Microscopy and Imaging Center, Viral Vector Core, Integrated Bioinformatics core) for outstanding technical assistance. We thank Mr. Chris McGee for help with animal *in vivo* imaging; Dr. Kyathanahalli Janardhan and Ms. Natasha P. Clayton, for advice and analysis of animal tissues; Dr. Grace Kissling for advice on statistical analysis. We are indebted to Dr. Takashi Shimbo (Osaka University) for technical advice. This work was supported, in part, by the Intramural Research Program of the National Institute of Environmental Health Sciences, NIH (ES101965 to PAW, ES043010 to LP).

## Figure legends

### **Figure 1. ZnFn2 mutant tumors are frequently observed in luminal B breast cancers and have worse survival.**

(a) GATA3 mutations associate with favorable prognosis. Histogram shows distribution of GATA3 expression in the METABRIC cohort (left). Patients are categorized into low (<8) or high (>9.5) GATA3 expression group, and these groups were applied for Kaplan Meier survival analyses (10-year survival). High GATA3 expression cases were used for the survival analysis shown in right panel. Log rank p-values are indicated in the panels. (b) Distribution of GATA3 mutations found in breast tumors. The mutation data was obtained from the METABRIC cohort via the cBio Cancer Genomics Portal. The positions of zinc-finger motifs were obtained from the Uniprot database<sup>42</sup>. (c-d) Subtype frequency in each GATA3 expression/mutation class. The PAM50 classified subtypes were used to generate pie charts. (e) Kaplan-Meier 10-year survival analyses of patients expressing GATA3 mutations. “Other GATA3 mutations” indicates the cases that possess any GATA3 mutations other than ZnFn2 mutations. Log rank p-values are indicated in the panels. Higher GATA3 expression cases were used to generate the survival curve.

### **Figure 2. GATA3 R330fs mutation facilitates tumor proliferation.**

(a) The protein domain structures of wild-type GATA3 and R330fs mutant are indicated on the top. (b) Schematic diagram of genome-editing by the CRISPR-Cas9 method. (c) Immunoblot analysis of the R330fs mutant clone (CR3). (d) Representative images of control T47D and CR3 cells. The scale bar indicates 100  $\mu$ m. (e) Tumor growth in the mouse xenograft model. The average bioluminescence signals are quantified and plotted with SEM as error bars (N  $\geq$ 12). E2 = estradiol pellet. Representative images are shown at the bottom. The red outline over tumors encompasses 97% of total bioluminescent signal in each animal. \*P < 0.05, \*\*P < 0.01, unpaired t-test.

### **Figure 3. R330fs mutation reprograms the luminal transcriptional program in breast cancer cells**

(a) Volcano plot displaying the differentially expressed genes between control and GATA3 mutant (CR3) cells. Up-regulated genes in CR3 cells are highlighted in red, and down-regulated genes are highlighted in blue. Genes with  $-\log_{10} p$  values  $\geq 300$  are all plotted at 300 on the ordinate. (b) Clustered heatmap showing expression patterns in T47D, CR3 and ExoR330fs cells from three biological replicates. The scale indicates Euclidean distance. (c) The top molecular and cellular function related pathways. The IPA (Ingenuity Pathway Analysis) analysis was conducted by using top 100 up-regulated genes (ranked by fold-changes), and the top 5 pathway categories are presented. (d) The upstream regulators predicted by the Ingenuity Pathway Analysis (IPA, QIAGEN) of down-regulated genes are listed. Progesterone receptor was identified as one of the down-regulated factors in CR3 cells. (e) Heatmap showing the row-scaled FPKM values of the *in vivo* RNA-seq data. The differentially expressed genes identified by the *in vitro* RNA-seq shown in panel (a) are categorized into up- and down-regulated gene groups. (f) Box-and-whisker plots showing relative fold changes in each category. Random genes indicate the randomly selected subset of 600 genes that were not categorized as up- or down-regulated genes. (g) Top 20 genes identified by Oncomine concept analysis. Down-regulated genes in CR3 cells were used as input gene set for the gene ontology analysis (Oncomine). 84 genes were significantly down-regulated in the tumors from the patients who died at 1 year. Genes are ranked by p-values.

### **Figure 4. R330fs GATA3 mutation induces genome-wide relocation of GATA3.**

(a) Representative genome browser tracks at differential GATA3 binding loci. UCSC Genome Browser views showing the mapped read coverage of ChIP-seq

(GATA3, ER $\alpha$ , and FOXA1), ATAC-seq and RNA-seq data. The differential binding sites are highlighted in yellow. The read densities in T47D and CR3 cells are presented in blue and red, respectively. **(b)** Differential binding analysis of GATA3 binding events in control T47D versus CR3 cells. Increased and decreased binding events in CR3 cells are indicated in red and blue, respectively. The conserved binding events are presented in yellow. CPM indicates counts per million in each peak region. **(c)** Read density heatmaps showing the signal intensities of GATA3 ChIP-seq in T47D (left) or CR3 (right) cells. The number of peaks in each category is reported below the group label. Each row indicates a 2 kbp window centered on a GATA3 binding site. The scale of read density after normalization is indicated at the bottom left. **(d)** GSEA analysis showing the correlation between each class of GATA3 binding and gene expression. **(e)** Scatter plots of normalized ATAC-seq signals in each GATA3 peak group. Normalized read counts in CR3 cells (Y-axis) were plotted against the counts in T47D cells (X-axis).

**Figure 5. Aberrant chromatin binding property of R330fs mutant influences GATA3 localization.**

**(a)** Representative genome browser tracks at R330fs mutant binding loci. UCSC Genome Browser views showing the mapped read coverage of R330fs mutant, wild-type GATA3, and total GATA3 ChIP-seq data. The read densities in T47D and CR3 cells are presented in blue and red, respectively. **(b)** Top-ranked motif at R330fs and wild-type GATA3 binding sites. The motif was identified by MEME. **(c)** Metaplot profiles of normalized R330fs mutant ChIP-seq signals. The normalized signals in each GATA3 peak group were plotted. **(d)** Venn diagram showing the overlap between wild-type GATA3 peaks in CR3 (red) and R330fs mutant peaks (yellow). **(e)** Read density heatmap showing the ChIP-seq signals of R330fs mutant and wild-type GATA3 in each peak category (defined by peak overlap analysis shown in the panel D). **(f)** Consensus and non-consensus GATA3 binding motifs. The box plots showing the number of motifs/peak in each

peak group (R330fs-WT common, R330fs unique, WT unique). The bar graphs showing the frequency of peaks that contain the AGATBD motif or WGATAR motif. (g) Immunostaining of F-actin by phalloidin as observed by confocal laser scanning microscopy. Green: F-actin; blue: DAPI.

**Figure 6. ZnFn2 mutant cells exhibit low PR expression, and growth advantage in the presence of progesterone.**

(a) Immunoblots showing the expression level of GATA3 (top), PR-B and PR-A (middle).  $\beta$ -actin levels (bottom) are shown as a loading control. (b) PR gene expression analysis in the GATA3-peak depleted cells by CRISPR-Cas9. Relative expression was calculated by the delta-delta Ct method.  $**P < 0.01$ , unpaired t-test. (c) Cell proliferation analysis of GATA3 mutant cells in the presence of progesterone. Data are presented as mean with SD. (d) Representative images of cell proliferation analysis. The cells are stained with crystal violet after the treatment with indicated concentration of progesterone. (e) Cell proliferation analysis of CR3 cells transduced with PR-A and PR-B expression vectors. (f) Cell proliferation analysis of PR knockdown cells in the presence of progesterone. (g) Tumor growth analysis by mouse xenograft experiments. Estrogen and progesterone pellets were implanted subcutaneously one week prior to cell injection, which was defined as time zero. Data are shown as mean with SEM ( $N \geq 10$ ).  $*P < 0.05$ .

**Figure 7. Progesterone regulatory network is impaired in R330fs mutant cells**

(a) Clustered heatmap showing the differential gene expression (DEG) by progesterone (150 nM, 3h) treatment in T47D and CR3 cells. The genes are first grouped by DEG status (up- and down- regulation are indicated as red and blue arrows respectively), then sorted by decreasing FPKM within each group. (b)

Up- and down- regulated genes in T47D cells and CR3 cells after progesterone treatment. Venn diagram represent the overlap between differentially expressed genes in T47D cells and CR3 cells. **(c)** Representative genome browser tracks at differential PR binding sites. UCSC Genome Browser views showing the mapped read coverage of PR ChIP-seq. **(d)** Differential binding analysis of PR binding events in control T47D versus CR3 cells. Increased, decreased, and unchanged binding events are indicated in red, blue, and yellow respectively. CPM = counts per million. **(e)** Box-and-whisker plots displaying the PR and TWISTS1 expression levels in GATA3 mutant tumors. Expression data were collected from the luminal A and luminal B tumors in each GATA3 status category (the METABRIC cohort). Whiskers indicate 10th and 90th percentiles. Means and medians are shown as plus signs and black lines, respectively. \*P < 0.05, \*\*P < 0.01, \*\*\*P < 0.001, \*\*\*\*P < 0.0001, Mann-Whitney test. **(f-g)** The oncomine concept analyses. 427 uniquely up-regulated genes in progesterone-treated T47D cells were used as the input gene set. q-value: estimated false discovery rates. **(f)** Heatmap showing the positive correlation between the uniquely up-regulated genes and PR status in the clinical gene expression data. The top 10 genes (ranked by p-values) are shown. **(g)** Heatmap showing the underexpression of the uniquely up-regulated genes in the aggressive tumors (patients died at 3 years). The top 10 genes are shown.

## **Methods**

### **Cell line and cell culture**

The T47D and MCF7 cells were obtained from ATCC. The KPL-1 cell line was kindly provided by Dr. John Colicelli. All cell lines were cultured in DMEM high-glucose medium with 10% FBS (Thermo Fisher Scientific) at 37°C (with 10% CO<sub>2</sub>). For the xenograft experiments, the Luc2-tdTomato fusion gene was transduced into T47D cells using the pHAGE lentiviral vector. The Luc2-tdTomato fusion gene was obtained from the pcDNA3.1(+)/Luc2=tdT vector (a gift from Dr. Christopher Contag) (Addgene plasmid #32904)<sup>43</sup>. The pHAGE vector, PR shRNA, and GATA3 shRNA vectors were kindly provided by Dr. Guang Hu (NIEHS/NIH). pRR-PR-5Z was a gift from Charles Miller (Addgene plasmid # 23057)<sup>44</sup>, and used to generate PR-A and PR-B expression vector.

### **Generation of GATA3 mutant cell line**

The guide RNA was designed by the Dr. Feng Zhang Laboratory webtool (crispr.mit.edu). The double-stranded oligonucleotides were inserted into the PX458 plasmid. pSpCas9(BB)-2A-GFP (PX458) was a gift from Dr. Feng Zhang (Addgene plasmid # 48138)<sup>45</sup>. The homology donor dsDNA was generated by the SLIC cloning method<sup>46</sup>. The primers were listed in Supplementary table 5. T47D cells were co-transfected with the PX458 vector and amplified donor DNAs. Wild-type or R330fs mutation (2-nucleotide deletions at Chromosome 10: 8,111,563-8,111,565) containing donor DNA was used for the generation of CRctrl or CR3 respectively. The antibiotics selection was started 72h after transfection. After a one-week treatment with blasticidin, single cell clones were isolated, and positive clones were screened by PCR. The antibiotics gene cassette was removed by FLP recombination using the pSICO-Flpo vector (a gift from Dr. Tyler Jacks laboratory, Addgene plasmid # 24969)<sup>47</sup>.

### **Xenograft studies**

All animal studies were approved by the NIEHS Animal Care and Use Committee and conducted in accordance with The Guide to the Care and Use of Laboratory

Animals, 8th edition. All experiments were blinded. Four week-old BALB/c nude female mice were obtained from Charles River and maintained on an alfalfa-free diet in the NIEHS animal facility. 17 $\beta$ -estradiol (90 day release, 0.72 mg) pellets and/or progesterone (90 day release, 10 mg per pellet) pellets (Innovative Research of America) were implanted subcutaneously one week before cell injection. One million cells (expressing the Luc2-tdTomato fusion protein) were resuspended in USP grade PBS(-) and mixed in a 1:1 ratio with growth-factor reduced, LDEV-free matrigel (Corning). The cell suspension (100  $\mu$ L / animal) was injected into inguinal mammary fat pads (N=15). Tumor growth was monitored and measured once a week by bioluminescence signals 20 min after intraperitoneal luciferin injection (150 mg/kg body weight) using the Spectrum In Vivo Imaging System (PerkinElmer). The bioluminescence signals were quantified by Living Image version 4.4 software (PerkinElmer). Regions of interest (ROI) were determined by the Auto ROI tool (threshold parameter: 3%), and quantified as photons/second.

### **Enhancer deletion**

The guide RNAs were designed by the Feng Zhang Laboratory web tool. Annealed oligonucleotides were ligated into the lentiGuide-Puro vector (a kind gift of Dr. Feng Zhang (Addgene plasmid # 52963)<sup>48</sup>. The viruses were produced by transient transfection of 293T cells with the Cas9 vector, psPAX2, and pMD2.G plasmids. psPAX2 and pMD2.G were gifts from Dr. Didier Trono (Addgene plasmid #12260, #12259). To enhance the target deletion efficiency, T47D cells were co-infected with two viruses carrying two different gRNAs, which target 200 to 300 bp flanking regions (Supplementary table 5). The stable cell pools were established by a two-week selection with Puromycin.

### **ChIP-seq**

ChIP experiments were performed as previously described<sup>18</sup>. Briefly, cells were fixed with 1% formaldehyde at room temperature for 10 min and quenched with glycine. Fixed cells were further treated with hypotonic buffer<sup>18</sup> and resuspended



in lysis buffer (20 mM Tris-HCl pH 8.0, 2 mM EDTA, 0.5 mM EGTA, 0.5 mM PMSF, 5 mM sodium butyrate, 0.1% SDS and protease inhibitor cocktail). Chromatin was fragmented by sonication with Covaris S220, then diluted to adjust the SDS concentration to 0.05%. Immunoprecipitation was performed with indicated antibodies (Supplementary table 6). A protein A/G Dynabeads mixture (1:1 ratio) was used to capture antibodies. Eluted DNA was reverse crosslinked at 65°C, followed by the incubation with proteinase K. DNA was purified by AMPure XP (Beckman Coulter). The sequencing libraries were prepared by the NEXTflex Rapid DNA-seq kit (Bioo Scientific Corporation) and sequenced on NextSeq 500 (Illumina) at the NIEHS Epigenomics Core Facility. Reads were filtered based on a mean base quality score >20, and mapped to hg19 genome by Bowtie 0.12.8 allowing only uniquely-mapped hits<sup>49</sup>. Duplicate reads were removed using MarkDuplicates.jar from picard-tools-1.107 package. Paired-end reads were converted to a single fragment for metaplot analyses and visualization on the UCSC Genome Browser. For the PR ChIP-seq, the cells were treated with 150 nM progesterone or the same volume of the vehicle (ethanol) for 3h.

### **Peak call**

Peak calling analyses were performed using HOMER v4.1 with default parameters (Heinz et al., 2010). Only the first read of each read pair was used for peak calling.

### **Pathway analysis**

All (Fig. 7) or the top 100 (Supplementary fig. 2) differentially expressed genes were used to perform the IPA (Ingenuity Pathway Analysis) gene ontology analyses (QIAGEN). For the identification of the association with cancer related gene expression patterns indicated in Supplementary table 1-2, all differentially expressed genes ( $|\text{fold change}| > 2$ ,  $\text{FDR} < 0.01$ ) were applied to the ONCOMINE Concept Analyses (Thermo Fisher Scientific), while the top 427 uniquely up-regulated genes in progesterone-treated T47D cells were used for the analysis in Fig. 7f-g.

### **Peak classification**

EdgeR<sup>50</sup> was used to classify the ChIP-seq peaks (GATA3, ER $\alpha$ , FOXA1) into three groups (Increased, Decreased, Unchanged) based on the ChIP-seq signal differences between control cells and CR3 cells. Read counts per 400 bp window, centered on peaks, were collected then evaluated with the GLM method. Classification thresholds were set at FDR <0.05 and |fold change| >1.5. For heatmap visualization, read counts were normalized to 35 million total mapped fragments per sample.

### **Clinical data analysis**

The METABRIC clinical data and gene expression/mutation data were obtained from the Cancer Genomics Data Server R (cgdsr) package (hosted by the Computational Biology Center at Memorial-Sloan-Kettering Cancer Center, the data were obtained on October 24th 2016) and cBio Cancer Genomics Portal (<http://cbioportal.org>). For the PAM50 subtype analyses of the METABRIC cases, we used the previously defined classification, described in<sup>51</sup>. The TCGA breast cancer data were obtained from the public TCGA data portal.

### **Immunostaining**

For the F-actin staining, cells were fixed with 2% formaldehyde for 15 min at room temperature and permeabilized with PBS buffer containing 0.1% Triton-X100. The cells were further incubated with Phalloidin CruzFluor 488 Conjugate (Santa Cruz Biotechnology) and mounted in Vectashield mounting medium with DAPI.

### **Immunoblotting**

Cells were lysed with sample loading buffer, and extracted proteins were separated by SDS-PAGE. Anti-GATA3 (Cell Signaling), anti-progesterone receptor (Cell Signaling), and anti- $\beta$ -actin (Abcam) antibodies were used as primary antibodies. Anti-rabbit IgG or mouse IgG HRP-conjugated antibody

(GE Healthcare) was used as a secondary antibody. The chemiluminescent signals were detected by the Odyssey Fc Imaging System, and analyzed by the Image Studio software (LI-COR).

### **Cell proliferation assay**

Cells were resuspended in 5% FBS-containing DMEM and spread on a 24-well plate (50,000 cells/well). After incubation at 37°C for 24 h, the medium was replaced to progesterone- or vehicle- (ethanol) containing medium. The medium was replaced every day for 3 days, at which time the total cell number was counted using a Coulter counter (Beckman).

### **Gene expression analysis**

Total RNAs from cultured breast cancer cells were purified by RNeasy Kit or miRNeasy kit (QIAGEN). For the progesterone stimulation, cells were incubated with 150 nM progesterone (or ethanol as a control) for 3h. Total RNAs from tumor tissues were extracted by QIAzol Reagent and purified by miRNAeasy kit (QIAGEN). The purified RNA concentration was measured by a NanoDrop 1000 Spectrophotometer (Thermo Fisher Scientific). The cDNAs were synthesized by using iScript cDNA Synthesis Kit (Bio-Rad Laboratories). Quantitative PCR was performed using the CFX384 Real-Time PCR Detection System (Bio-Rad Laboratories). Relative expression was calculated by delta-delta Ct method. TBP was used as a reference gene for normalization.

### **RNA-seq**

Library preparation and sequencing were performed by Q2 Solutions on an Illumina platform (HiSeq 2000). Libraries for RNA-seq analysis of tumors excised from the mouse xenograft model were prepared by TruSeq RNA Library Prep Kit (Illumina), and sequenced on NextSeq 500 (Illumina) at the NIEHS Epigenomics Core Facility. Raw read pairs were filtered to require a minimum average base quality score of 20. Filtered read pairs were mapped against the hg19 reference genome by STAR (version 2.5) with the following parameters: --

outSAMAttrIHstart 0 --outFilterType BySJout --alignSJoverhangMin 8 --  
outMultimapperOrder Random (other parameters at default settings)<sup>52</sup>. Mapped  
read counts per gene were collected by Subread featureCounts (version 1.5.0-p1).  
Differentially expressed genes were identified with DESeq2 (v1.10.1) using  
filtering thresholds of FDR <0.01 and |fold change| >2<sup>53</sup>. The gene models are  
taken from hg19 RefSeq annotations, downloaded from the UCSC Genome  
Browser on March 28, 2016. DESeq2 (v1.10.1) was also used to generate a  
clustered heatmap for visualizing sample similarity, where sample-to-sample  
distances were calculated for normalized counts from variance stabilizing  
transformation. Similarity is scored as the Euclidean distance between sample  
pairs. Thus, sample pairs with similar counts per gene across all gene models  
will have a low distance score (corresponding to dark blue color).

For the GSEA analysis, we filtered the expression data to only include genes with  
a nonzero read count for all samples. We then performed a GSEA analysis, using  
the GSEA Java software version 2.1.0 and default parameters, with this  
expression data set and various gene lists obtained from ChIP-seq peaks. We  
associated the ChIP-seq peaks with genes by identifying the closest RefSeq TSS  
to each peak center. We excluded any peaks that were more than 50 kbp from the  
nearest TSS.

### **ATAC-seq**

The sequence library for ATAC-seq (Buenrostro et al., 2013) was prepared as  
previously described (Takaku et al., 2016) with the following minor  
modifications. 25,000 cells were incubated in CSK buffer on ice for 5 min. 2.5  
µl of Tn5 Transposase was added to a total 25 µl reaction mixture. After PCR  
amplification (8 total cycles), DNA fragments were purified with AMPure XP  
(1:3 ratio of sample to beads). The libraries were sequenced on NextSeq 500 at  
the NIEHS Epigenomics Core Facility. Reads were filtered based on a mean  
base quality score >20. After adapter trimming by Trim Galore! (Babraham  
Institute), reads were mapped to hg19 genome using Bowtie 0.12.8 (Langmead  
et al., 2009). Unique reads (non- duplicate reads) were used for the subsequent

analysis.

### **Simulating the solvated mutant structure**

X-ray crystal structure of DNA-bound human GATA transcription factor complex (PDB: 4HCA) was used as a template to model the mutant structure (with the sequence

MGRECVNCGATSTPLWRRDGTGHYLCNACGLYHKMNGQNRPLIKPKR  
R LSAARRA GTSCANCQTTTTTLWEECQWGPCLQCLWALLQASQY).

Missing and non-identical residues were introduced using the program, Modeller V9.14 (Sali and Blundell, 1993). The resultant mutant structure was first energy minimized in vacuum and then subjected to a lengthy molecular dynamics simulation using the program, Amber.14 (D.A. Case, 2014). Prior to energy minimization, missing protons were added and then, the mutant was energy minimized using Amber force field, FF14SB (D.A. Case, 2014). The optimized structure was then solvated in a box of water (with 8357 molecules). Prior to equilibration, the system was subjected to: (1) a nanosecond of constrained molecular dynamics with the backbone of the mutant peptide constrained to the original positions with a force constant of 10kcal/mol/nm, (2) minimization, (3) low temperature constant pressure simulation to assure a reasonable starting density, (4) minimization, (5) step-wise heating at constant volume, and (6) a 2 ns constant volume, constant temperature molecular dynamics run. The final structure was then subjected to a 10 ns constant temperature simulation to obtain a reasonable solvated structure for the mutant.

### **Data and Software Availability**

Data pertinent to this study are available at Gene Expression Omnibus under Accession Number GSE99479.

<https://www.ncbi.nlm.nih.gov/geo/query/acc.cgi?acc=GSE99479>

### **Quantification and Statistical Analysis**

Kaplan-Meier survival curves, box plots were generated by Prism 6 (GraphPad Software). P-values were calculated by Prism 6 (GraphPad Software). Unpaired t-tests were applied to Fig. 2e, 5h, 6g, Supplementary fig. 6f, and 6g. Log rank tests were applied to Fig. 1c and Supplementary fig. 1g. Fisher's exact tests were applied to Supplementary fig. 1e and 7h. Mann-Whitney tests were applied to Fig. 1f, 5f, 7e and Supplementary fig. 7g. Chi-square tests were applied to Supplementary fig. 4e.

## References

1. Herschkowitz, J.I. *et al.* Identification of conserved gene expression features between murine mammary carcinoma models and human breast tumors. *Genome Biol* **8**, R76 (2007).
2. Perou, C.M. *et al.* Molecular portraits of human breast tumours. *Nature* **406**, 747-52 (2000).
3. Sorlie, T. *et al.* Gene expression patterns of breast carcinomas distinguish tumor subclasses with clinical implications. *Proc Natl Acad Sci U S A* **98**, 10869-74 (2001).
4. Pereira, B. *et al.* The somatic mutation profiles of 2,433 breast cancers refines their genomic and transcriptomic landscapes. *Nat Commun* **7**, 11479 (2016).
5. The Cancer Genome Atlas Network. Comprehensive molecular portraits of human breast tumours. *Nature* **490**, 61-70 (2012).
6. Ho, I.C. *et al.* Human GATA-3: a lineage-restricted transcription factor that regulates the expression of the T cell receptor alpha gene. *Embo j* **10**, 1187-92 (1991).
7. Ko, L.J. *et al.* Murine and human T-lymphocyte GATA-3 factors mediate transcription through a cis-regulatory element within the human T-cell receptor delta gene enhancer. *Mol Cell Biol* **11**, 2778-84 (1991).
8. Kouros-Mehr, H., Slorach, E.M., Sternlicht, M.D. & Werb, Z. GATA-3 maintains the differentiation of the luminal cell fate in the mammary gland. *Cell* **127**, 1041-55 (2006).
9. Montserrat, N. *et al.* Reprogramming of human fibroblasts to pluripotency with lineage specifiers. *Cell Stem Cell* **13**, 341-50 (2013).
10. Shu, J. *et al.* Induction of pluripotency in mouse somatic cells with lineage specifiers. *Cell* **153**, 963-75 (2013).
11. Eeckhoute, J. *et al.* Positive cross-regulatory loop ties GATA-3 to estrogen receptor alpha expression in breast cancer. *Cancer Res* **67**, 6477-83 (2007).
12. Hoch, R.V., Thompson, D.A., Baker, R.J. & Weigel, R.J. GATA-3 is expressed in association with estrogen receptor in breast cancer. *Int J Cancer* **84**, 122-8 (1999).
13. Liu, J. *et al.* GATA3 mRNA expression, but not mutation, associates with longer progression-free survival in ER-positive breast cancer patients treated with first-line tamoxifen for recurrent disease. *Cancer Lett* **376**, 104-9 (2016).
14. Mehra, R. *et al.* Identification of GATA3 as a breast cancer prognostic marker by global gene expression meta-analysis. *Cancer Res* **65**, 11259-64 (2005).
15. Chou, J. *et al.* GATA3 suppresses metastasis and modulates the tumour microenvironment by regulating microRNA-29b expression. *Nat Cell Biol* **15**, 201-13 (2013).
16. Dydensborg, A.B. *et al.* GATA3 inhibits breast cancer growth and pulmonary breast cancer metastasis. *Oncogene* **28**, 2634-42 (2009).
17. Yan, W., Cao, Q.J., Arenas, R.B., Bentley, B. & Shao, R. GATA3 inhibits breast cancer metastasis through the reversal of epithelial-mesenchymal transition. *J Biol Chem* **285**, 14042-51 (2010).
18. Takaku, M. *et al.* GATA3-dependent cellular reprogramming requires activation-domain dependent recruitment of a chromatin remodeler. *Genome Biol* **17**, 36 (2016).
19. Zaret, K.S. & Carroll, J.S. Pioneer transcription factors: establishing competence for gene expression. *Genes Dev* **25**, 2227-41 (2011).
20. Theodorou, V., Stark, R., Menon, S. & Carroll, J.S. GATA3 acts upstream of FOXA1 in mediating ESR1 binding by shaping enhancer accessibility. *Genome Res* **23**, 12-22 (2013).
21. Ciriello, G. *et al.* Comprehensive Molecular Portraits of Invasive Lobular Breast Cancer. *Cell* **163**, 506-19 (2015).
22. Adomas, A.B. *et al.* Breast tumor specific mutation in GATA3 affects physiological mechanisms regulating transcription factor turnover. *BMC Cancer* **14**, 278 (2014).
23. Cohen, H. *et al.* Shift in GATA3 functions, and GATA3 mutations, control progression and clinical presentation in breast cancer. *Breast Cancer Res* **16**, 464 (2014).
24. Usary, J. *et al.* Mutation of GATA3 in human breast tumors. *Oncogene* **23**, 7669-78 (2004).
25. Takaku, M., Grimm, S.A. & Wade, P.A. GATA3 in Breast Cancer: Tumor Suppressor or Oncogene? *Gene Expr* **16**, 163-8 (2015).
26. Prat, A. *et al.* Characterization of cell lines derived from breast cancers and normal mammary tissues for the study of the intrinsic molecular subtypes. *Breast Cancer Res Treat* **142**, 237-55 (2013).

27. Hsu, P.D., Lander, E.S. & Zhang, F. Development and applications of CRISPR-Cas9 for genome engineering. *Cell* **157**, 1262-78 (2014).
28. Yang, J. & Weinberg, R.A. Epithelial-mesenchymal transition: at the crossroads of development and tumor metastasis. *Dev Cell* **14**, 818-29 (2008).
29. Boersma, B.J. *et al.* A stromal gene signature associated with inflammatory breast cancer. *Int J Cancer* **122**, 1324-32 (2008).
30. Buenrostro, J.D., Giresi, P.G., Zaba, L.C., Chang, H.Y. & Greenleaf, W.J. Transposition of native chromatin for fast and sensitive epigenomic profiling of open chromatin, DNA-binding proteins and nucleosome position. *Nat Methods* **10**, 1213-8 (2013).
31. Purdie, C.A. *et al.* Progesterone receptor expression is an independent prognostic variable in early breast cancer: a population-based study. *Br J Cancer* **110**, 565-72 (2014).
32. Barretina, J. *et al.* The Cancer Cell Line Encyclopedia enables predictive modelling of anticancer drug sensitivity. *Nature* **483**, 603-7 (2012).
33. Reinhold, W.C. *et al.* CellMiner: a web-based suite of genomic and pharmacologic tools to explore transcript and drug patterns in the NCI-60 cell line set. *Cancer Res* **72**, 3499-511 (2012).
34. Mohammed, H. *et al.* Progesterone receptor modulates ERalpha action in breast cancer. *Nature* **526**, 144 (2015).
35. Musgrove, E.A., Lee, C.S. & Sutherland, R.L. Progestins both stimulate and inhibit breast cancer cell cycle progression while increasing expression of transforming growth factor alpha, epidermal growth factor receptor, c-fos, and c-myc genes. *Mol Cell Biol* **11**, 5032-43 (1991).
36. Poulin, R., Dufour, J.M. & Labrie, F. Progestin inhibition of estrogen-dependent proliferation in ZR-75-1 human breast cancer cells: antagonism by insulin. *Breast Cancer Res Treat* **13**, 265-76 (1989).
37. Waddell, N. *et al.* Gene expression profiling of formalin-fixed, paraffin-embedded familial breast tumours using the whole genome-DASL assay. *J Pathol* **221**, 452-61 (2010).
38. Pawitan, Y. *et al.* Gene expression profiling spares early breast cancer patients from adjuvant therapy: derived and validated in two population-based cohorts. *Breast Cancer Res* **7**, R953-64 (2005).
39. Gaynor, K.U. *et al.* GATA3 mutations found in breast cancers may be associated with aberrant nuclear localization, reduced transactivation and cell invasiveness. *Horm Cancer* **4**, 123-39 (2013).
40. Mair, B. *et al.* Gain- and Loss-of-Function Mutations in the Breast Cancer Gene GATA3 Result in Differential Drug Sensitivity. *PLoS Genet* **12**, e1006279 (2016).
41. Pedone, P.V. *et al.* The N-terminal fingers of chicken GATA-2 and GATA-3 are independent sequence-specific DNA binding domains. *Embo j* **16**, 2874-82 (1997).
42. UniProt Consortium. UniProt: a hub for protein information. *Nucleic Acids Res* **43**, D204-12 (2015).
43. Patel, M.R. *et al.* Longitudinal, noninvasive imaging of T-cell effector function and proliferation in living subjects. *Cancer Res* **70**, 10141-9 (2010).
44. Miller, C.A., 3rd, Tan, X., Wilson, M., Bhattacharyya, S. & Ludwig, S. Single plasmids expressing human steroid hormone receptors and a reporter gene for use in yeast signaling assays. *Plasmid* **63**, 73-8 (2010).
45. Ran, F.A. *et al.* Genome engineering using the CRISPR-Cas9 system. *Nat Protoc* **8**, 2281-308 (2013).
46. Li, M.Z. & Elledge, S.J. Harnessing homologous recombination in vitro to generate recombinant DNA via SLIC. *Nat Methods* **4**, 251-6 (2007).
47. Young, N.P. & Jacks, T. Tissue-specific p19Arf regulation dictates the response to oncogenic K-ras. *Proc Natl Acad Sci U S A* **107**, 10184-9 (2010).
48. Sanjana, N.E., Shalem, O. & Zhang, F. Improved vectors and genome-wide libraries for CRISPR screening. *Nat Methods* **11**, 783-4 (2014).
49. Langmead, B., Trapnell, C., Pop, M. & Salzberg, S.L. Ultrafast and memory-efficient alignment of short DNA sequences to the human genome. *Genome Biol* **10**, R25 (2009).
50. Robinson, M.D., McCarthy, D.J. & Smyth, G.K. edgeR: a Bioconductor package for differential expression analysis of digital gene expression data. *Bioinformatics* **26**, 139-40 (2010).
51. Prat, A. *et al.* Molecular features and survival outcomes of the intrinsic subtypes within HER2-positive breast cancer. *J Natl Cancer Inst* **106**(2014).



52. Dobin, A. *et al.* STAR: ultrafast universal RNA-seq aligner. *Bioinformatics* **29**, 15-21 (2013).
53. Love, M.I., Huber, W. & Anders, S. Moderated estimation of fold change and dispersion for RNA-seq data with DESeq2. *Genome Biol* **15**, 550 (2014).

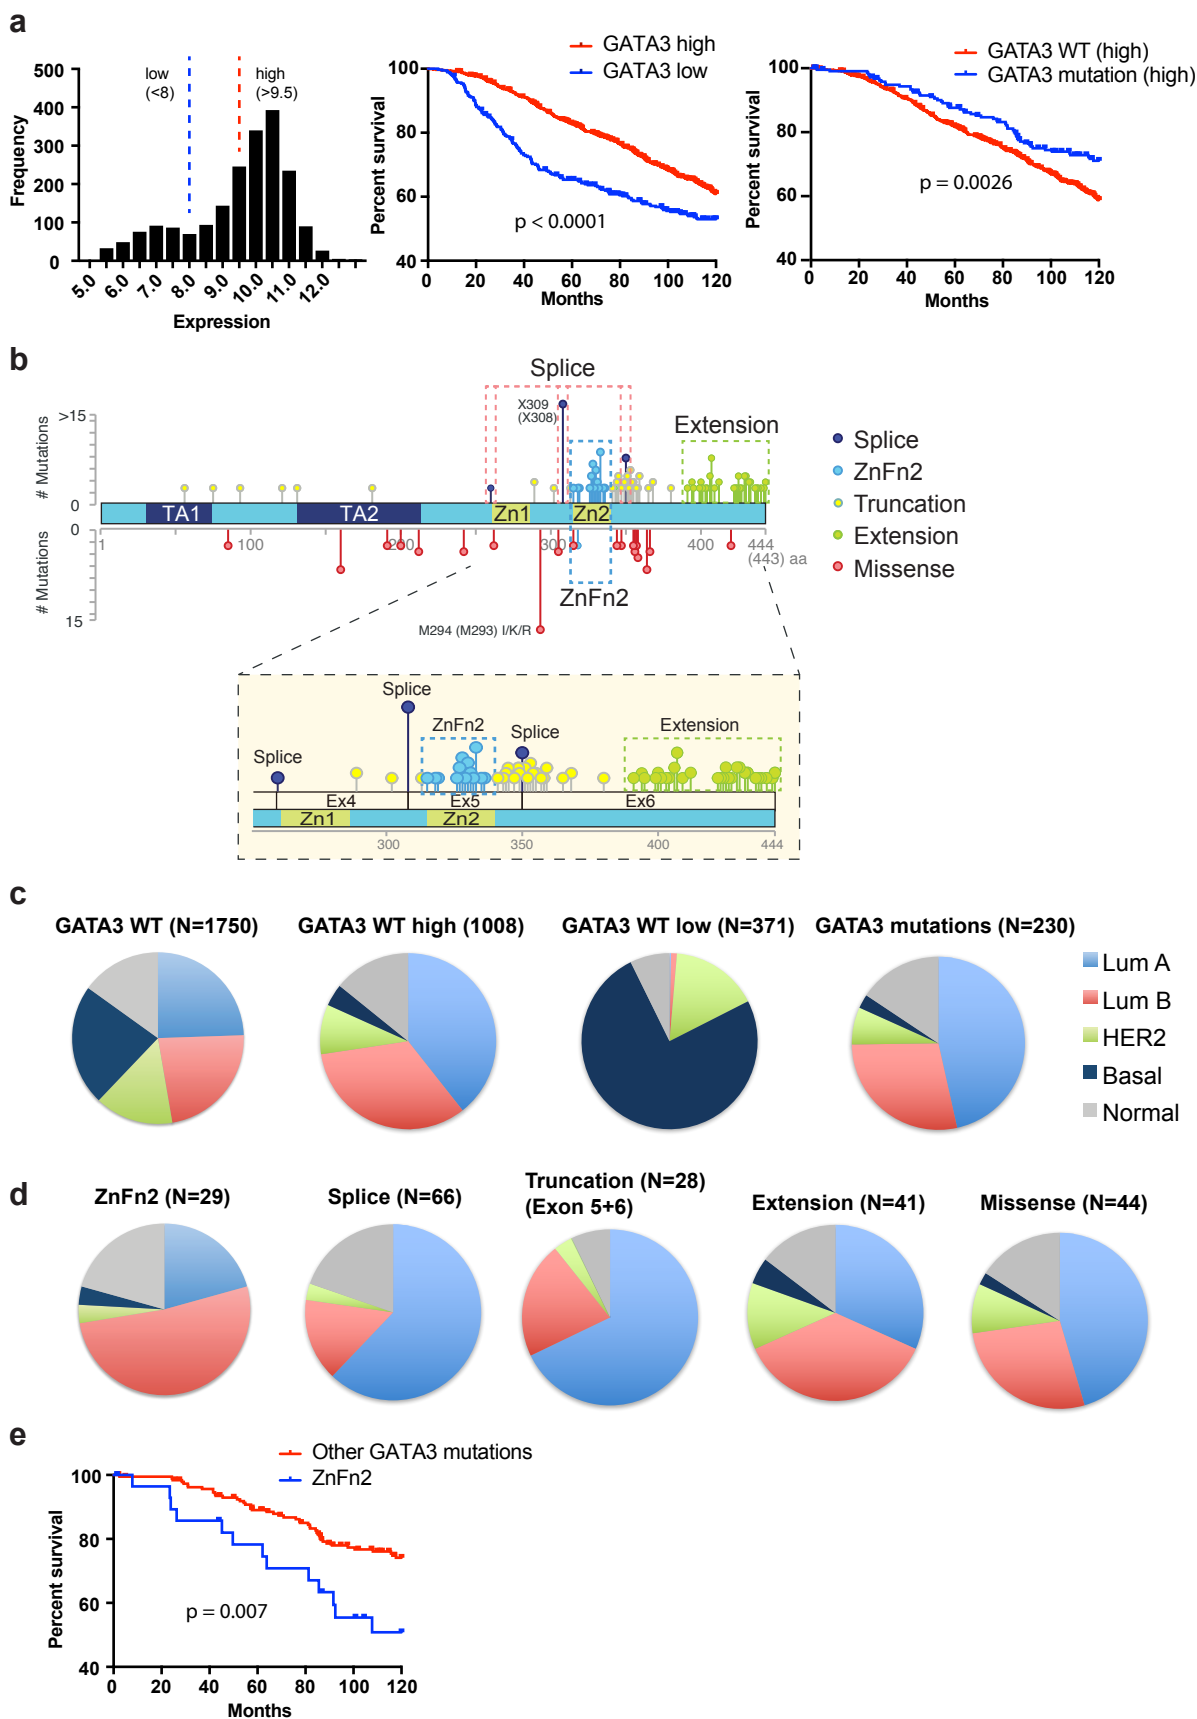

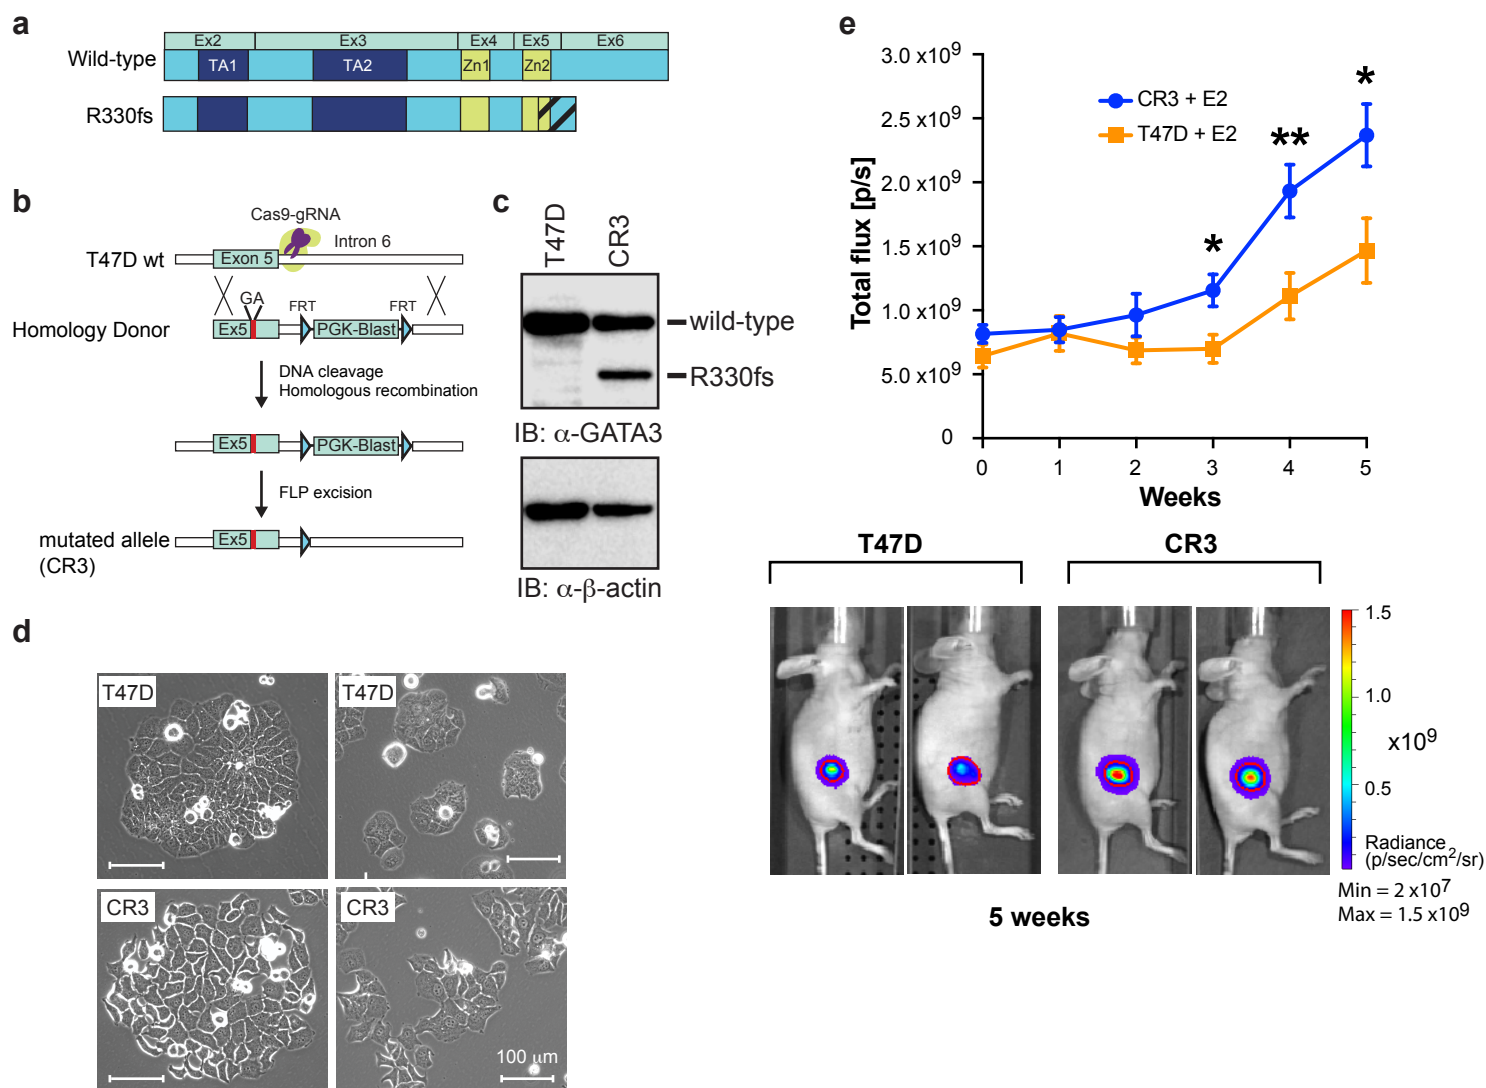

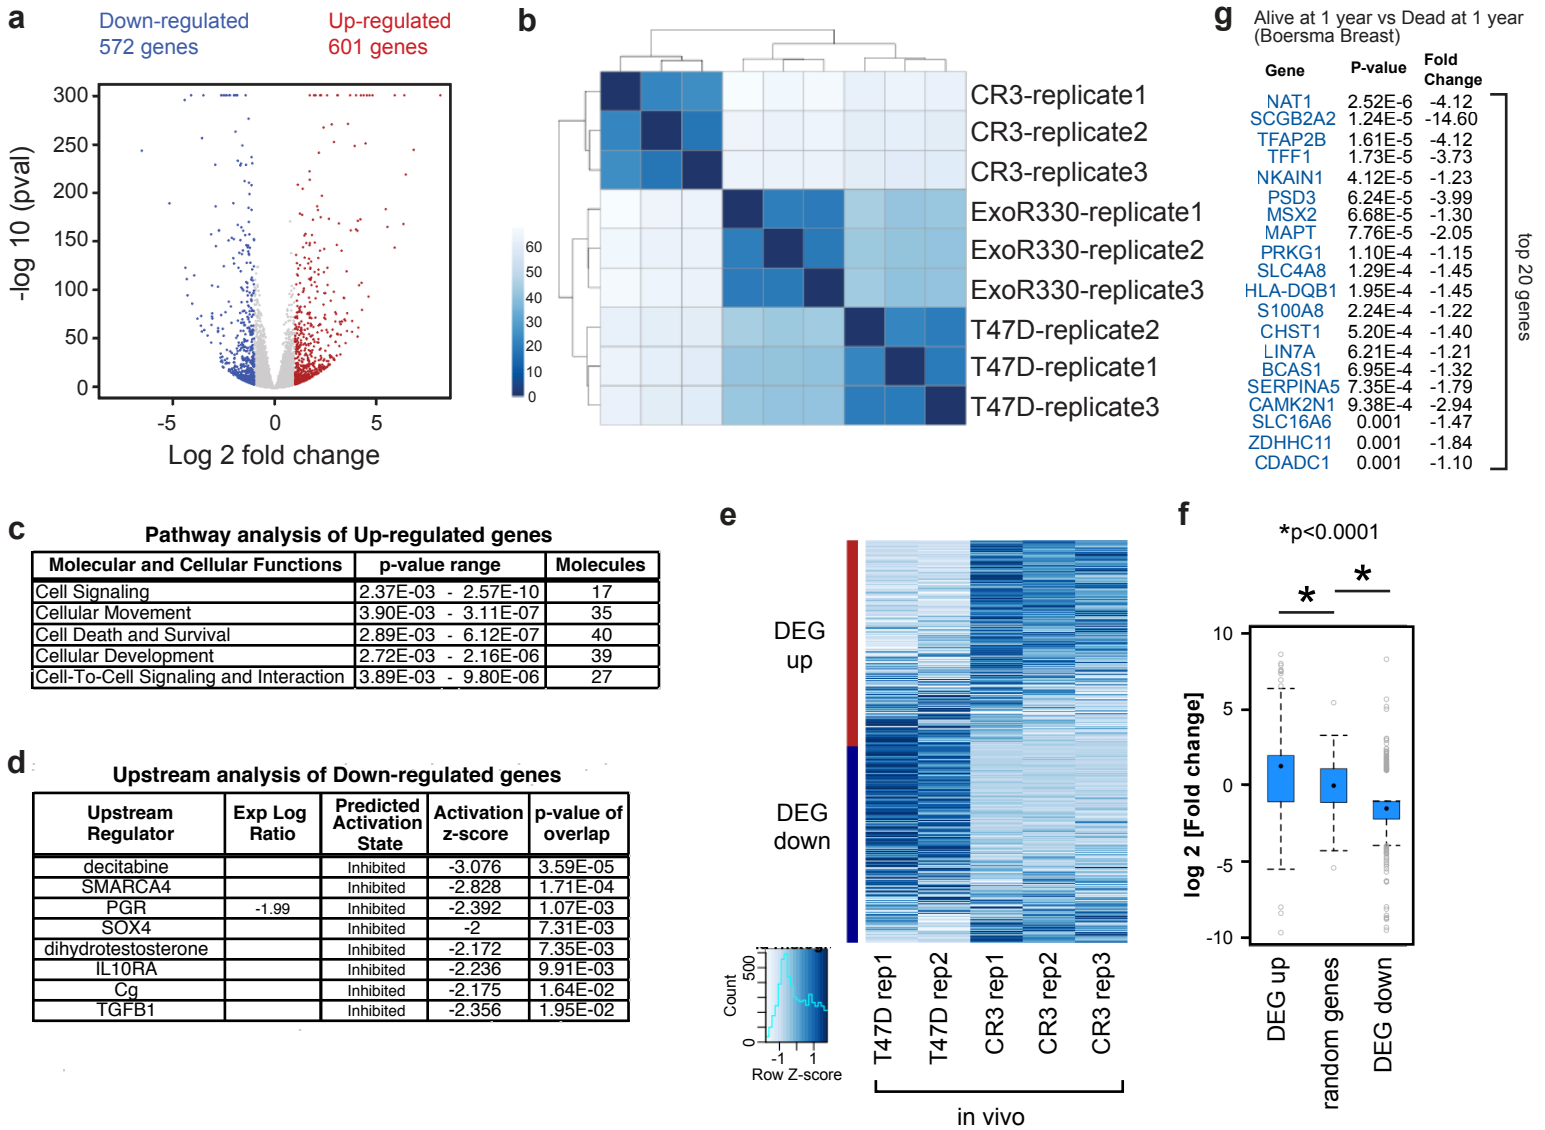

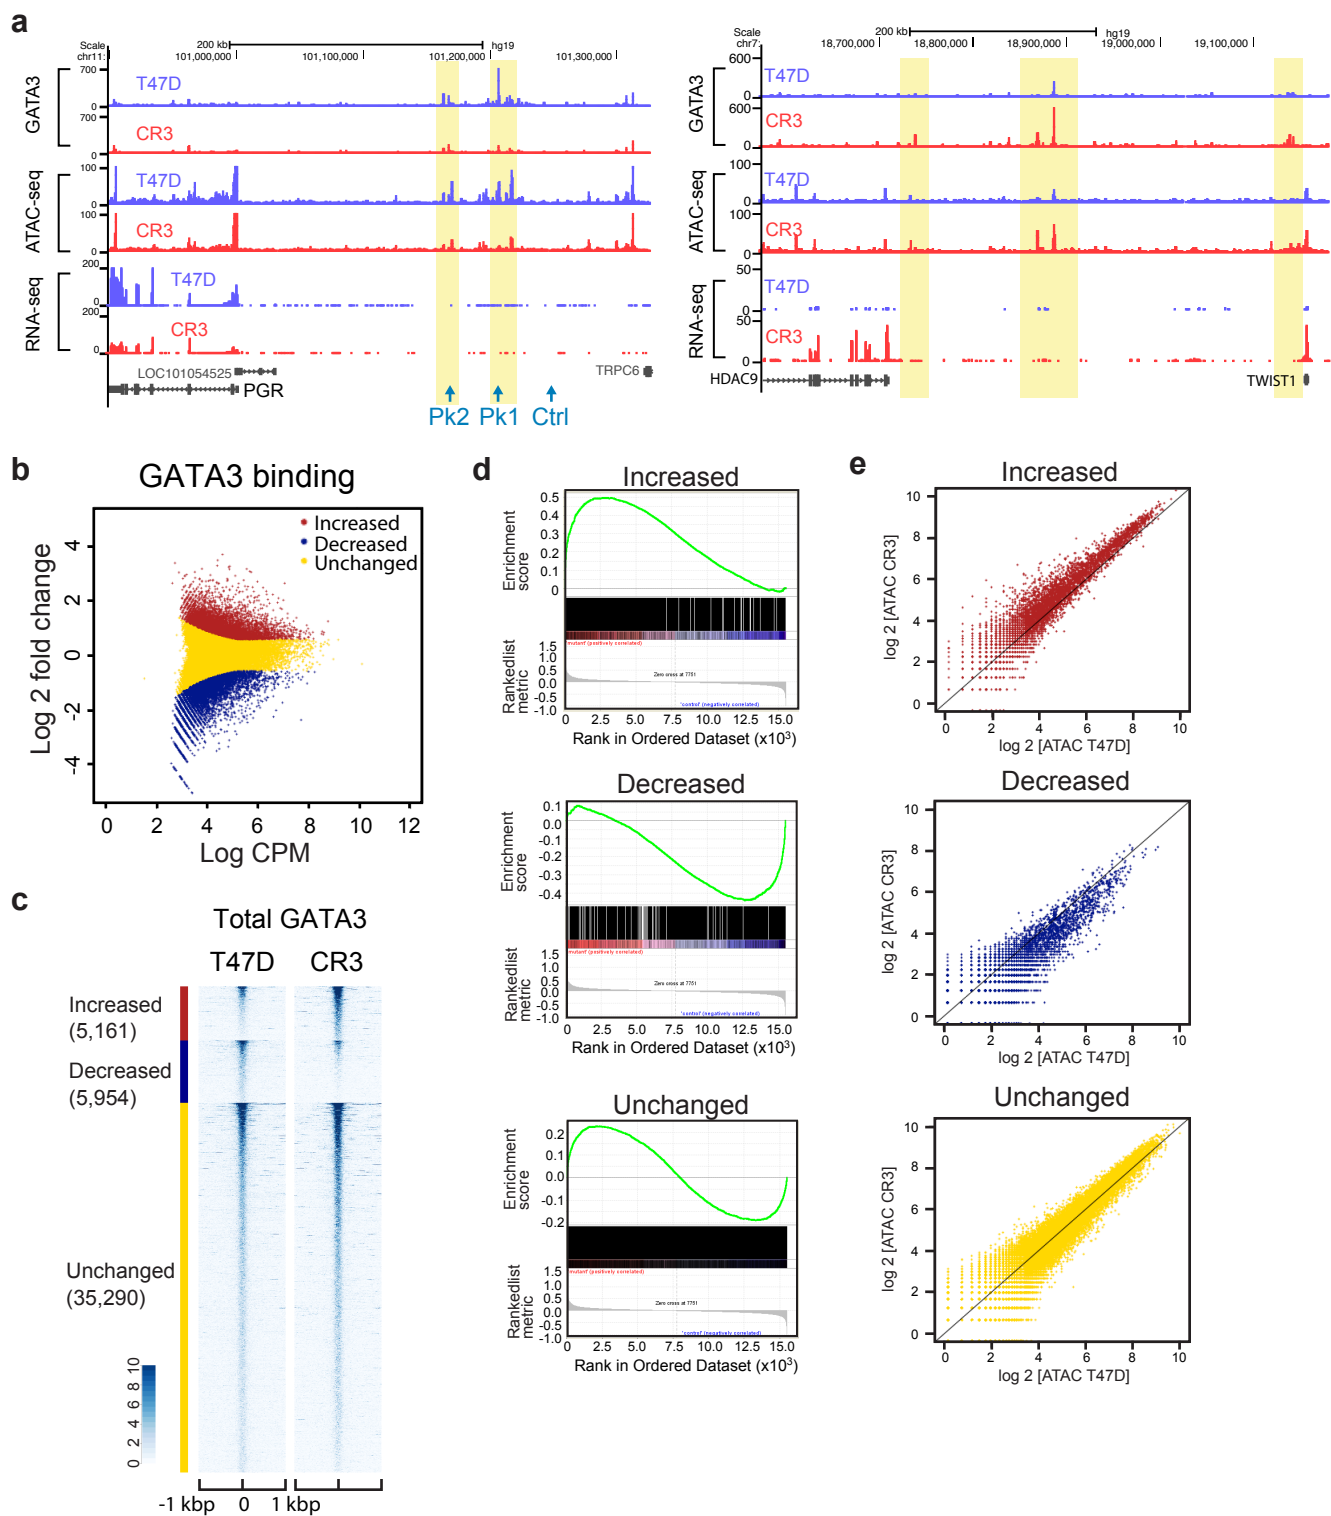

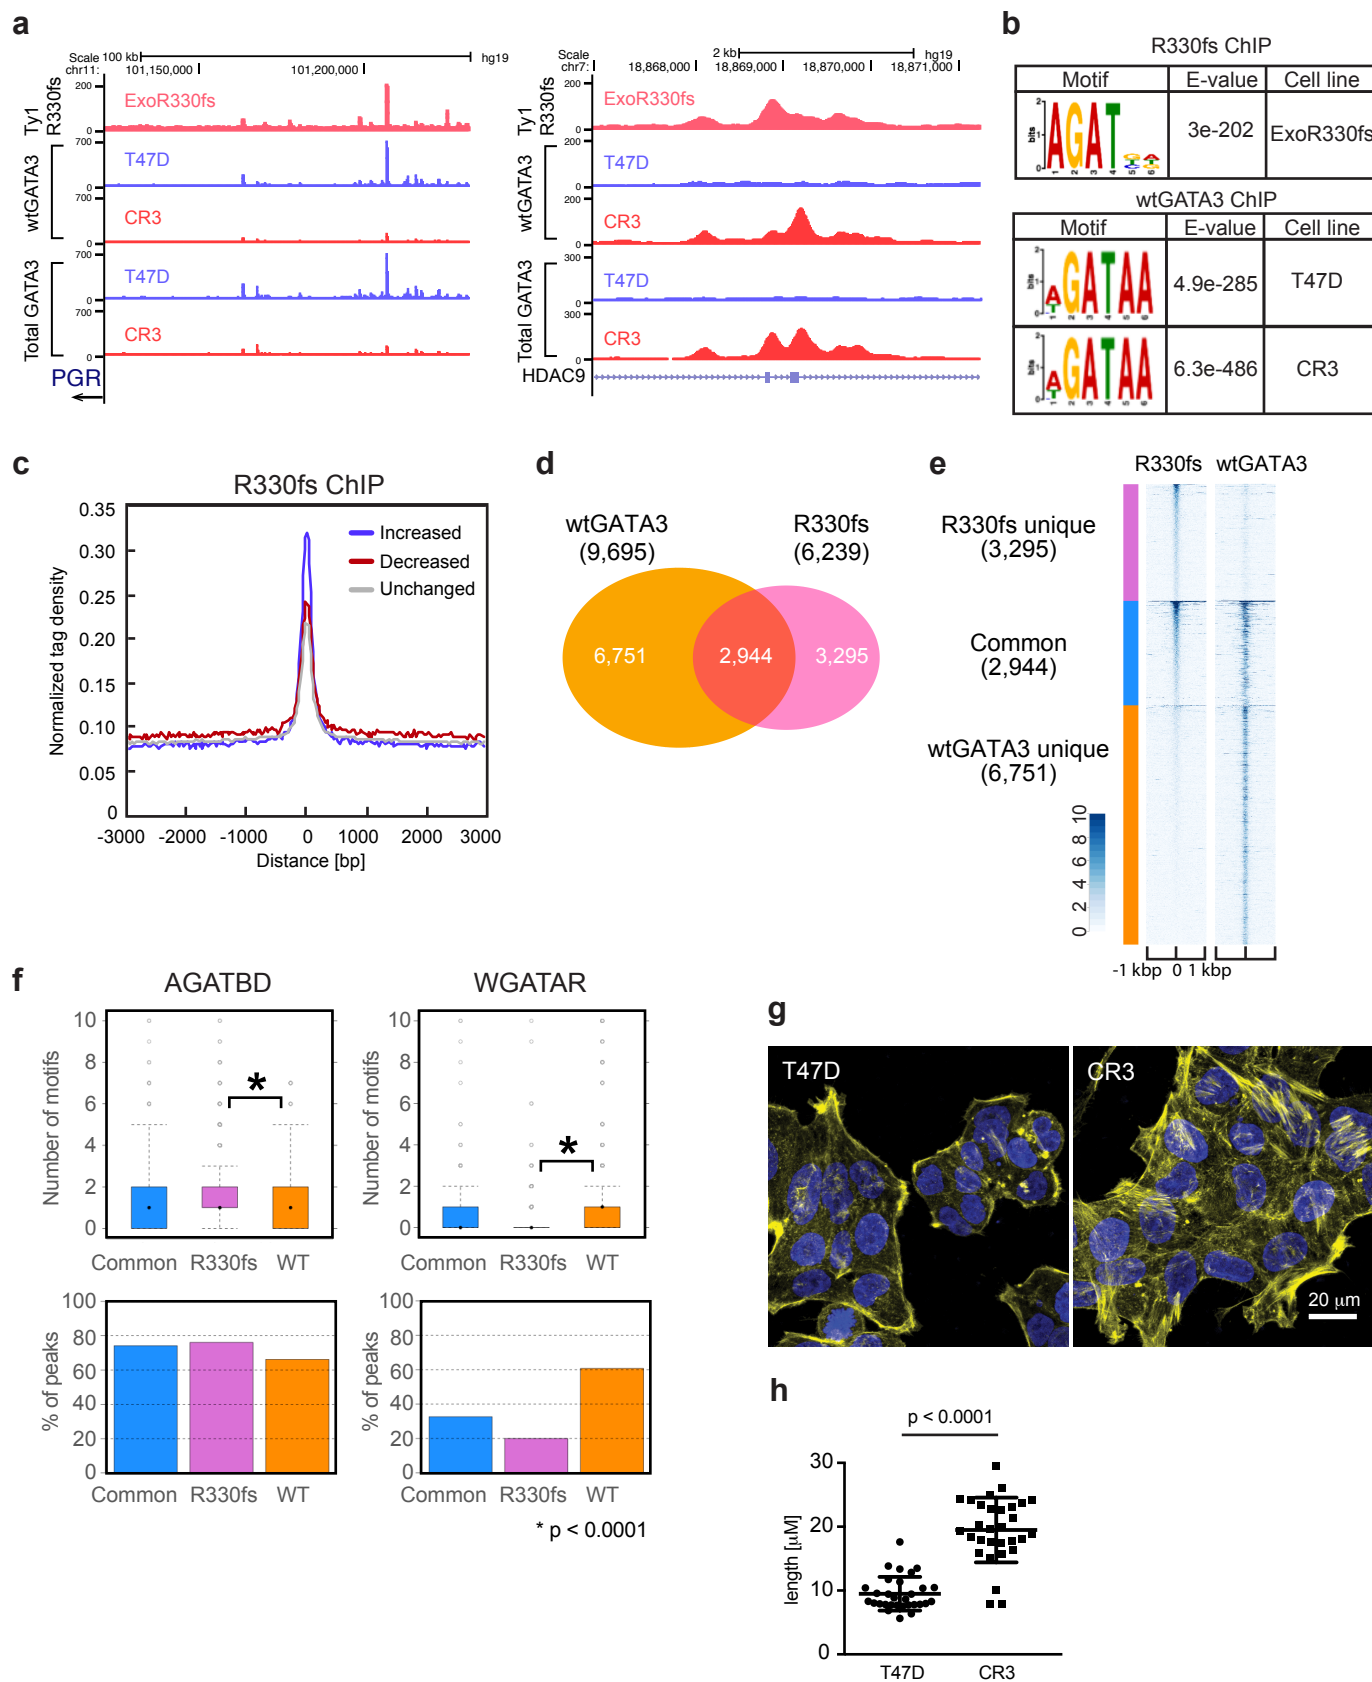

Takaku et al. Figure 6

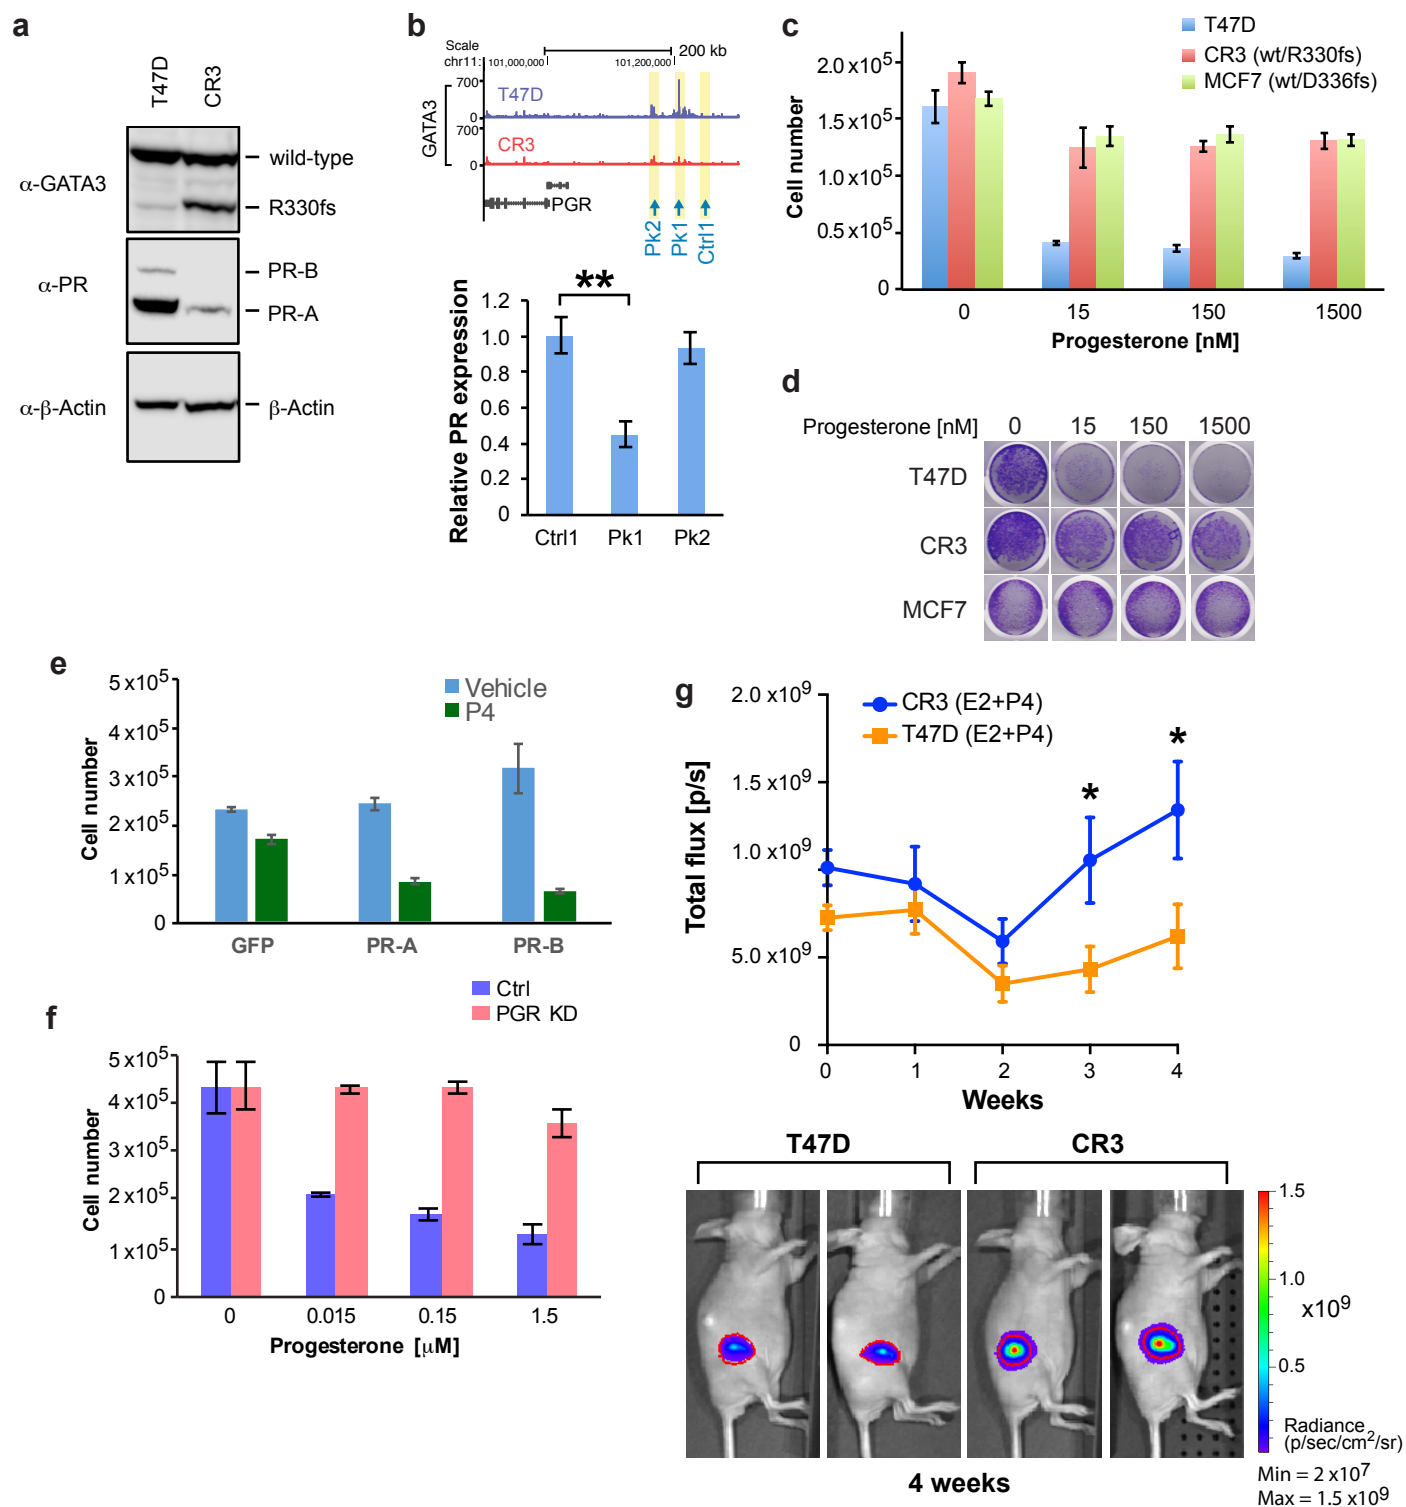

Source: https://www.biorxiv.org/content/10.1101/204289v1.full.pdf
